# Supplementary material for: Line group approach for quantum chemical study of intrinsic helical twist of ultrathin tellurium nanorods
Source: Royal Society of Chemistry journal article supplement (doi:10.1039/d4ce00352g), 2024-01-01
Supplement: d4ce00352g1.pdf [file d4ce00352g1.pdf]

## Line group approach for quantum chemical study of intrinsic helical twist of ultrathin tellurium nanorods

Vitaly V. Porsev,\* Andrei V. Bandura, Robert A. Evarestov  
Quantum Chemistry Department, St. Petersburg State University

**Table S1.** Cell parameters of bulk tellurium P3<sub>1</sub>21.

|            | $a$ , Å    | $c$ , Å    | $E_{\text{gap}}$ , eV |
|------------|------------|------------|-----------------------|
| Experiment | 4.456 [S1] | 5.921 [S1] | 0.33 [S2]             |
| PBE0       | 4.666      | 5.811      | 1.499                 |
| PBE        | 4.482      | 5.958      | 0.271                 |
| PBE-D3     | 4.322      | 5.943      | 0.079                 |

[S1] – C.Adenis, V.Langer, O.Lindqvist // Reinvestigation of the Structure of Tellurium. Acta Cryst. C 45 (1989) 941. <https://doi.org/10.1107/S0108270188014453>

[S2] - V.B.Anzin, M.I.Eremets, Yu.V.Kosichkin, A.I.Nadezhdinskii, A.M.Shirokov // Measurement of the energy gap in tellurium under pressure. Phys. Stat. Solidi A 42 (1977) 385. <https://doi.org/10.1002/pssa.2210420143>

Cell parameters of hypothetical bulk tellurium P4<sub>1</sub>22 (PBE):

$$a = 4.458 \text{ \AA}$$

$$c = 7.376 \text{ \AA}$$

$$E_{\text{gap}} = 0.048 \text{ eV}$$

$$E_{\text{form}} = 12.5824 \text{ kJ/mol (Formation energy per Te atom, from P3}_{121} \text{ phase)}$$

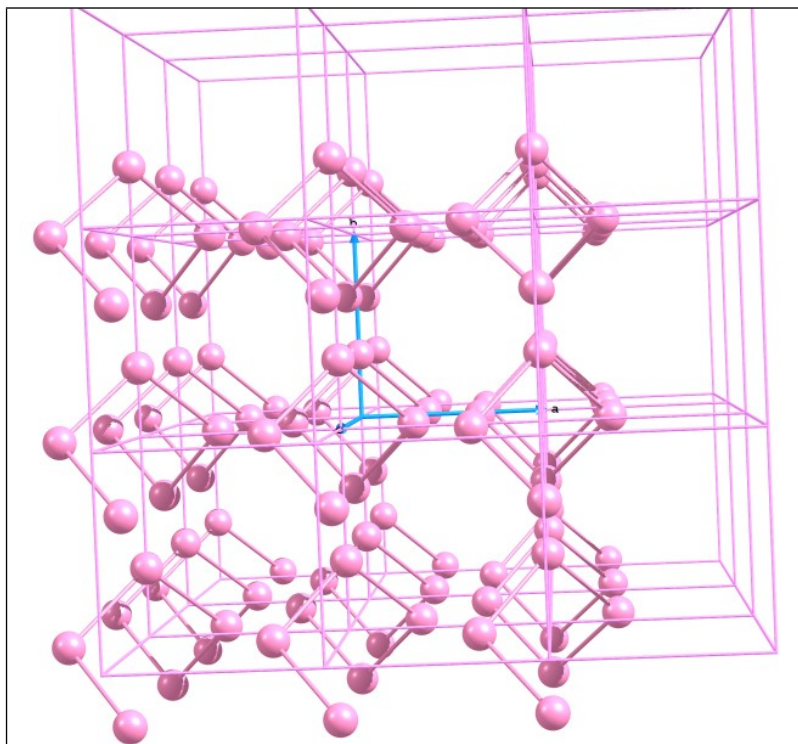

**Figure S1.** Top view of hypothetical bulk tellurium P4<sub>1</sub>22

## Interpolation polynomials:

**Figure 3:**

$$S(\text{hex}) = 0.14053 + 0.17854 * N(\text{hex})$$

$$S(\text{trig}) = -0.09616 + 0.16161 * N(\text{trig})$$

**Figure 4:**

$$E_f(\text{hex}) = 33.16571 * (1 + N(\text{hex}))^{-0.59599}$$

$$E_f(\text{trig}) = 32.11394 * (1 + N(\text{trig}))^{-0.58732}$$

**Figure 5:**

$$\text{Te1: } E_{\text{form}}(\varphi) = 132.1242 - 2.1060 * \varphi + 0.0099 * \varphi^2$$

$$\text{Te3: } E_{\text{form}}(\varphi) = 395.9012 - 6.5599 * \varphi + 0.0281 * \varphi^2$$

$$\text{Te6: } E_{\text{form}}(\varphi) = 1575.5734 - 26.2547 * \varphi + 0.1100 * \varphi^2$$

$$\text{Te7: } E_{\text{form}}(\varphi) = 2254.7654 - 37.6360 * \varphi + 0.1577 * \varphi^2$$

$$\text{Te10: } E_{\text{form}}(\varphi) = 3188.3318 - 53.1892 * \varphi + 0.2224 * \varphi^2$$

$$\text{Te19: } E_{\text{form}}(\varphi) = 8363.9214 - 139.5169 * \varphi + 0.5822 * \varphi^2$$

## Parameters of the energy minima of nanorods obtained in crystallographic paradigm

**Te1 (L3<sub>1</sub>21):**

$$E_{\text{form}} = 22.05375 \text{ kJ/mol}$$

$$E_{\text{gap}} = 1.5431 \text{ eV}$$

$$T = 5.72734959 \text{ \AA}$$

Cartesian coordinates of irreducible part. Ox - axis of periodicity.

|    |                |                 |                 |
|----|----------------|-----------------|-----------------|
| Te | 0.000000000000 | 0.5773575772259 | -1.000012657890 |
|----|----------------|-----------------|-----------------|

**Te7hex (L3<sub>1</sub>21):**

$$E_{\text{form}} = 9.17727 \text{ kJ/mol}$$

$$E_{\text{gap}} = 0.6671 \text{ eV}$$

$$T = 5.82654916 \text{ \AA}$$

Cartesian coordinates of irreducible part. Ox - axis of periodicity.

|    |                  |                  |                    |
|----|------------------|------------------|--------------------|
| Te | -0.0063272617660 | 5.12983001028200 | -0.976466543419100 |
|----|------------------|------------------|--------------------|

|    |                 |                  |                   |
|----|-----------------|------------------|-------------------|
| Te | 0.0000000000000 | 2.84689771027900 | -4.93097147815400 |
|----|-----------------|------------------|-------------------|

|    |                  |                  |                   |
|----|------------------|------------------|-------------------|
| Te | 1.93558361943699 | 2.89701169868200 | -2.89245925432900 |
|----|------------------|------------------|-------------------|

|    |                   |                  |                 |
|----|-------------------|------------------|-----------------|
| Te | -1.94218305333314 | 3.23600734007700 | 0.0000000000000 |
|----|-------------------|------------------|-----------------|

|    |                 |                   |                   |
|----|-----------------|-------------------|-------------------|
| Te | 0.0000000000000 | 0.637133639806200 | -1.10354783535600 |
|----|-----------------|-------------------|-------------------|

**Te19hex (L3<sub>1</sub>21):**

$$E_{\text{form}} = 5.55131 \text{ kJ/mol}$$

$$E_{\text{gap}} = 0.5803 \text{ eV}$$

$$T = 5.86943863 \text{ \AA}$$

Cartesian coordinates of irreducible part. Ox - axis of periodicity.

|    |                   |                  |                  |
|----|-------------------|------------------|------------------|
| Te | -0.00682253200120 | 9.61102475766800 | -0.9688334270407 |
|----|-------------------|------------------|------------------|

|    |                   |                  |                  |
|----|-------------------|------------------|------------------|
| Te | -0.04722101695221 | 7.41649564806900 | -4.8877178419260 |
|----|-------------------|------------------|------------------|

|    |                 |                  |                  |
|----|-----------------|------------------|------------------|
| Te | 0.0000000000000 | 5.09374139753200 | -8.8226189011420 |
|----|-----------------|------------------|------------------|

|    |                  |                  |                  |
|----|------------------|------------------|------------------|
| Te | 1.92925919426999 | 7.41186545006300 | -2.8698006566270 |
|----|------------------|------------------|------------------|

|    |                  |                  |                  |
|----|------------------|------------------|------------------|
| Te | 1.94603596966695 | 5.15300018145200 | -6.7886132381380 |
|----|------------------|------------------|------------------|

|    |                   |                  |                 |
|----|-------------------|------------------|-----------------|
| Te | -1.95647954333314 | 7.69507425739200 | 0.0000000000000 |
|----|-------------------|------------------|-----------------|

|    |                   |                  |                  |
|----|-------------------|------------------|------------------|
| Te | -1.96692900526183 | 5.53722147760700 | -3.9184130281550 |
|----|-------------------|------------------|------------------|

|    |                   |                   |                  |
|----|-------------------|-------------------|------------------|
| Te | -0.00470407414486 | 5.14980295353200  | -1.0845595656400 |
| Te | 0.00000000000000  | 2.92843375601900  | -5.0721960520240 |
| Te | 1.94379045137579  | 2.90140593443900  | -2.8873086431080 |
| Te | -1.95647954333314 | 3.26934930910400  | 0.00000000000000 |
| Te | 0.00000000000000  | 0.626942549658200 | -1.0858963494350 |

**Te37hex (L3<sub>1</sub>21):**

Eform = 3.94249 kJ/mol

Egap = 0.5038 eV

T = 5.89346233 Å

Cartesian coordinates of irreducible part. Ox - axis of periodicity.

|    |                   |                   |                    |
|----|-------------------|-------------------|--------------------|
| Te | -0.00424413389242 | 14.0743469402400  | -0.966865170537200 |
| Te | -0.04888329838237 | 11.8934427702300  | -4.87963655315600  |
| Te | -0.04762946131554 | 9.66318522245500  | -8.77211159547100  |
| Te | 0.00000000000000  | 7.33035057720700  | -12.6965396370100  |
| Te | 1.93786192358090  | 11.8850905259500  | -2.86630109628700  |
| Te | 1.92454323191078  | 9.68014847179200  | -6.73753697887100  |
| Te | 1.95205175728101  | 7.39290866411100  | -10.6661929945500  |
| Te | -1.96448744333314 | 12.1547933838800  | 0.00000000000000   |
| Te | -1.98010286549180 | 10.0007095952700  | -3.91474285303200  |
| Te | -1.98165350882034 | 7.80509128460100  | -7.79750588976100  |
| Te | -0.00289570768185 | 9.63036638976600  | -1.07922072502700  |
| Te | 0.014847793424675 | 7.39477190257900  | -5.01580407529600  |
| Te | 0.00000000000000  | 5.18239321451400  | -8.97616835233800  |
| Te | 1.98809734551526  | 7.37938328453900  | -2.86052095373300  |
| Te | 1.94798725494296  | 5.15732697655100  | -6.79614364134700  |
| Te | -1.96448744333314 | 7.74450113603300  | 0.00000000000000   |
| Te | -1.93083910754023 | 5.51131738228600  | -3.93320786039700  |
| Te | -0.00269701551945 | 5.13739492561100  | -1.08594704766200  |
| Te | 0.00000000000000  | 2.89711021250500  | -5.01794208318500  |
| Te | 1.96334381340128  | 2.88749761057900  | -2.84257531032000  |
| Te | -1.96448744333314 | 3.25966864968600  | 0.00000000000000   |
| Te | 0.00000000000000  | 0.627355873875100 | -1.08661224797800  |

**Te61hex (L3<sub>1</sub>21):**

Eform = 3.04908 kJ/mol

Egap = 0.4457 eV

T = 5.90790299 Å

Cartesian coordinates of irreducible part. Ox - axis of periodicity.

|    |                   |                  |                    |
|----|-------------------|------------------|--------------------|
| Te | -0.00269961801821 | 18.5408777239200 | -0.965606674713100 |
| Te | -0.04441918082841 | 16.3621018273300 | -4.88213293615000  |
| Te | -0.05311696084003 | 14.1437767435200 | -8.76437128858700  |
| Te | -0.04360528297932 | 11.9054586224800 | -12.6467638821200  |
| Te | 0.00000000000000  | 9.56481069848800 | -16.5667380945600  |
| Te | 1.94427174703246  | 16.3559796363500 | -2.87021103592600  |
| Te | 1.92816322662634  | 14.1591178946100 | -6.72872819846500  |
| Te | 1.92859641106529  | 11.9312267799500 | -10.6078406477200  |
| Te | 1.95638554139935  | 9.62907243658400 | -14.5400742818800  |
| Te | -1.96930099666647 | 16.6230576033400 | 0.00000000000000   |
| Te | -1.98490421647116 | 14.4693288912800 | -3.91670136558500  |
| Te | -1.99499008520504 | 12.2751755307500 | -7.79006225202200  |
| Te | -1.98483809676404 | 10.0570233559000 | -11.6724236569600  |

|    |                   |                   |                   |
|----|-------------------|-------------------|-------------------|
| Te | -0.00181137379408 | 14.1044424984900  | -1.07595975075700 |
| Te | 0.021756642911057 | 11.8689027059700  | -4.99921241525900 |
| Te | 0.014486057045516 | 9.64912504105600  | -8.90610457672300 |
| Te | 0.00000000000000  | 7.42304305548800  | -12.8570877188800 |
| Te | 1.99971051057818  | 11.8597045606300  | -2.85315090031900 |
| Te | 1.98971588316074  | 9.63402707662900  | -6.75126858273900 |
| Te | 1.95360140371690  | 7.40181224774300  | -10.6811455055200 |
| Te | -1.96930099666647 | 12.2159457639100  | 0.00000000000000  |
| Te | -1.92834756099215 | 9.98176897819400  | -3.92148510146900 |
| Te | -1.93421127145284 | 7.76945942546900  | -7.82860046655700 |
| Te | -0.00396231924073 | 9.62086432657500  | -1.08113263263300 |
| Te | -0.00116627137816 | 7.38419257314800  | -5.00741336461300 |
| Te | 0.00000000000000  | 5.15338019789900  | -8.92591633348100 |
| Te | 1.97222044160898  | 7.37615229481800  | -2.83750101904300 |
| Te | 1.96452768058208  | 5.13905597299500  | -6.75262647008900 |
| Te | -1.96930099666647 | 7.74226037289300  | 0.00000000000000  |
| Te | -1.96604824296149 | 5.50397584178700  | -3.91677216840200 |
| Te | -0.00073753141304 | 5.13601848586700  | -1.08742470034300 |
| Te | 0.00000000000000  | 2.89036069346200  | -5.00625157327700 |
| Te | 1.96858630281471  | 2.88299807890900  | -2.83056074399000 |
| Te | -1.96930099666647 | 3.25882472276800  | 0.00000000000000  |
| Te | 0.00000000000000  | 0.626418108644800 | -1.08498799095400 |

**Te91hex (L3<sub>1</sub>21):**

E<sub>form</sub> = 2.48365 kJ/mol

E<sub>gap</sub> = 0.4132 eV

T = 5.91755254 Å

Cartesian coordinates of irreducible part. Ox - axis of periodicity.

|     |                   |                  |                   |
|-----|-------------------|------------------|-------------------|
| 252 | -0.00151026816367 | 23.0054471033500 | -0.96517185667330 |
| 252 | -0.04070702855894 | 20.8325595572400 | -4.88273604704200 |
| 252 | -0.05118770911336 | 18.6139160463100 | -8.76718275076700 |
| 252 | -0.05042364520461 | 16.3899126433400 | -12.6379091303000 |
| 252 | -0.04147472883461 | 14.1428579556500 | -16.5182561852200 |
| 252 | 0.00000000000000  | 11.7988549687100 | -20.4362162769400 |
| 252 | 1.94832477180439  | 20.8262259234000 | -2.87234348609700 |
| 252 | 1.93180437148476  | 18.6320572735900 | -6.73138833957400 |
| 252 | 1.92913034288644  | 16.4131277437800 | -10.5950339134100 |
| 252 | 1.93235132182993  | 14.1732657396900 | -14.4793959761100 |
| 252 | 1.95945679767738  | 11.8641232829700 | -18.4121421353600 |
| 252 | -1.97251751333314 | 21.0895400109500 | 0.00000000000000  |
| 252 | -1.98700374962774 | 18.9412856189200 | -3.91948987814300 |
| 252 | -2.00001940537963 | 16.7453997723000 | -7.79177719215800 |
| 252 | -1.99819374215594 | 14.5313694254400 | -11.6634508697700 |
| 252 | -1.98728797185922 | 12.2994220944000 | -15.5448831819200 |
| 252 | -0.00099871356759 | 18.5745430471200 | -1.07392993470400 |
| 252 | 0.024156661934982 | 16.3418708717500 | -4.99427448998300 |
| 252 | 0.019437373489255 | 14.1204415549300 | -8.88334331027800 |
| 252 | 0.015807589390894 | 11.8945470464100 | -12.7843143816600 |
| 252 | 0.00000000000000  | 9.66034595409800 | -16.7322100111900 |
| 252 | 2.00469250408132  | 16.3354020007500 | -2.85346119264900 |
| 252 | 1.99988737734647  | 14.1120211993600 | -6.73634643624000 |
| 252 | 1.99226626424354  | 11.8823641483800 | -10.6292479757600 |

|     |                   |                   |                   |
|-----|-------------------|-------------------|-------------------|
| 252 | 1.95766103903446  | 9.64140233241600  | -14.5591589023000 |
| 252 | -1.97251751333314 | 16.6843402130100  | 0.0000000000000   |
| 252 | -1.92873329367260 | 14.4531940414400  | -3.91891619775000 |
| 252 | -1.93200213163591 | 12.2379879269600  | -7.80991181942700 |
| 252 | -1.93795560552173 | 10.0184458438200  | -11.7090210508900 |
| 252 | -0.00384880087519 | 14.0987726709600  | -1.07833543886900 |
| 252 | 0.003143606326083 | 11.8595348612500  | -4.99023539098500 |
| 252 | 0.002015337250171 | 9.62977473227200  | -8.90846191207000 |
| 252 | 0.00000000000000  | 7.39911844230400  | -12.8156490732900 |
| 252 | 1.98271883161811  | 11.8570784037500  | -2.82860796133100 |
| 252 | 1.97662812920366  | 9.61654921528000  | -6.74081786686200 |
| 252 | 1.96619209531343  | 7.38504488903900  | -10.6440584516100 |
| 252 | -1.97251751333314 | 12.2166239770700  | 0.0000000000000   |
| 252 | -1.96478304605072 | 9.98020669327800  | -3.90611561766500 |
| 252 | -1.96295904314433 | 7.75034123170700  | -7.81702254452900 |
| 252 | -0.00194503836760 | 9.62332339369500  | -1.08489010444200 |
| 252 | 0.002496152319081 | 7.38234382976300  | -5.00154062279800 |
| 252 | 0.00000000000000  | 5.14443620527900  | -8.91042488384000 |
| 252 | 1.97637441783520  | 7.37538859050100  | -2.82853624916900 |
| 252 | 1.97048122289241  | 5.13322862497000  | -6.73452877724400 |
| 252 | -1.97251751333314 | 7.74526675552800  | 0.0000000000000   |
| 252 | -1.96672608165019 | 5.50295347033700  | -3.90933077634700 |
| 252 | -0.00066121420584 | 5.12898010292500  | -1.08561091695600 |
| 252 | 0.00000000000000  | 2.88346996926900  | -4.99431648887300 |
| 252 | 1.97178157859504  | 2.87872666785200  | -2.82216814056900 |
| 252 | -1.97251751333314 | 3.25178242176500  | 0.0000000000000   |
| 252 | 0.00000000000000  | 0.626438380059400 | -1.08502310207400 |

**Te3trig (L<sub>3</sub><sub>1</sub>):**

Eform = 13.26267 kJ/mol

Egap = 1.2398 eV

T = 5.7605033 Å

Cartesian coordinates of irreducible part. Ox - axis of periodicity.

|    |                  |                   |                   |
|----|------------------|-------------------|-------------------|
| Te | 0.00386488124104 | 2.85214451065900  | 0.265905075627100 |
| Te | -0.0096365800538 | 0.554932119895000 | -3.57785582951800 |
| Te | 1.92593946547929 | 0.652324141537900 | -1.51192281007700 |

**Te6trig (L<sub>3</sub><sub>1</sub>):**

Eform = 9.64911 kJ/mol

Egap = 1.0892 eV

T = 5.78653469 Å

Cartesian coordinates of irreducible part. Ox - axis of periodicity.

|    |                  |                  |                    |
|----|------------------|------------------|--------------------|
| Te | -0.0409961320452 | 5.08179239100000 | 1.52161928781000   |
| Te | 0.03366468128155 | 2.90578524446000 | -2.32295705186900  |
| Te | -0.0596971613364 | 0.52535064822830 | -6.11410236473800  |
| Te | 1.98046519682890 | 2.94528339884600 | -0.223805921405800 |
| Te | 1.88866422367171 | 0.64236160943750 | -4.05116601816200  |
| Te | -1.8732559117340 | 1.04849989361400 | -1.28727160830400  |

**Te10trig (L<sub>3</sub><sub>1</sub>):**

Eform = 7.63565 kJ/mol

Egap = 0.8747 eV

T = 5.81839619 Å

Cartesian coordinates of irreducible part. Ox - axis of periodicity.

|    |                   |                   |                   |
|----|-------------------|-------------------|-------------------|
| Te | -0.06850280097890 | 7.28735360740000  | 2.79247969395100  |
| Te | 0.011812479211701 | 5.16704453104100  | -1.06467369994600 |
| Te | -0.00298718115445 | 2.89065355777400  | -4.87697614243100 |
| Te | -0.09148827914013 | 0.519529483415700 | -8.65283920473500 |
| Te | 1.95050772558200  | 5.18398541215500  | 1.02968746199200  |
| Te | 1.96765331100453  | 2.96450170296200  | -2.78816070968400 |
| Te | 1.87011604464490  | 0.627798553215500 | -6.59247991039800 |
| Te | -1.91169999033041 | 3.29584403392100  | -0.03174423532586 |
| Te | -1.91499679534981 | 1.04650626485600  | -3.85710363010300 |
| Te | 0.129050883177246 | 0.619959768503500 | -1.08750637595900 |

**Te15trig** (L3<sub>1</sub>):

Eform = 6.35218 kJ/mol

Egap = 0.8333 eV

T = 5.83970204 Å

Cartesian coordinates of irreducible part. Ox - axis of periodicity.

|    |                  |                   |                   |
|----|------------------|-------------------|-------------------|
| Te | -0.0962539527226 | 9.50299432165600  | 4.07197535693700  |
| Te | -0.0071291403576 | 7.38894491016200  | 0.204614772967400 |
| Te | -0.0030472558511 | 5.18398329366200  | -3.62746720349300 |
| Te | -0.0290739564713 | 2.87893351709900  | -7.42778293391500 |
| Te | -0.1195661319228 | 0.514600753020300 | -11.2045245691500 |
| Te | 1.93577892684803 | 7.40204634795100  | 2.29707351464100  |
| Te | 1.94714046993869 | 5.23137042653200  | -1.53345933531200 |
| Te | 1.95896833335152 | 2.95996415438200  | -5.34349550230500 |
| Te | 1.84862967679173 | 0.619414653312000 | -9.14907897543500 |
| Te | -1.9407604229744 | 5.51593582011100  | 1.23401370471200  |
| Te | -1.9328916124748 | 3.32789920761500  | -2.61212927032700 |
| Te | -1.9448766263719 | 1.04007686615600  | -6.41696011705600 |
| Te | 0.11065873305984 | 2.87805011261800  | 0.205876521165200 |
| Te | 0.09798270818009 | 0.608804924172200 | -3.67613619800300 |
| Te | 2.06757494431009 | 0.633202660322000 | -1.51678483521600 |

**Te21trig** (L3<sub>1</sub>):

Eform = 5.43489 kJ/mol

Egap = 0.7646 eV

T = 5.8563184 Å

Cartesian coordinates of irreducible part. Ox - axis of periodicity.

|    |                      |                   |                    |
|----|----------------------|-------------------|--------------------|
| Te | -0.113737047119240   | 11.7147158900700  | 5.35338735636300   |
| Te | -0.0298045864429719  | 9.61168197049100  | 1.48784170309500   |
| Te | -0.00797013760987467 | 7.42403537100200  | -2.36324182146600  |
| Te | -0.0168427134864     | 5.17994008757700  | -6.18514100509100  |
| Te | -0.0539656388493     | 2.86715558953900  | -9.98351307810500  |
| Te | -0.1401710947398     | 0.515910700106100 | -13.7611125666500  |
| Te | 1.91667804085544     | 9.61944159698000  | 3.57502274367000   |
| Te | 1.94082628060338     | 7.46420125122600  | -0.266970085203200 |
| Te | 1.95025253920375     | 5.24041599393900  | -4.09416595770000  |
| Te | 1.93984789931380     | 2.94693969616500  | -7.90555016415400  |
| Te | 1.83322889836176     | 0.616985435998200 | -11.7078970404700  |
| Te | -1.96867962135147    | 7.73905401567800  | 2.50855632410000   |
| Te | -1.94965011226890    | 5.56610944550800  | -1.35102044934700  |

|    |                   |                  |                    |
|----|-------------------|------------------|--------------------|
| Te | -1.95031762342815 | 3.33072606588400 | -5.17788943551400  |
| Te | -1.97562590800415 | 1.03023596401300 | -8.97805944313500  |
| Te | 0.09221641660952  | 5.10828707895700 | 1.48111286732200   |
| Te | 0.09440790690431  | 2.89237396454100 | -2.39458641509400  |
| Te | 0.07696613642783  | 0.59892207281170 | -6.23771819455400  |
| Te | 2.04767079040982  | 2.90930216329600 | -0.234280083598200 |
| Te | 2.05974539617843  | 0.62822838396050 | -4.07900677148300  |
| Te | -1.84086355490463 | 1.02098287699500 | -1.30489561710800  |

**Te28trig (L3<sub>1</sub>):**

Eform = 4.75517 kJ/mol

Egap = 0.6933 eV

T = 5.86903378 Å

Cartesian coordinates of irreducible part. Ox - axis of periodicity.

|    |                   |                   |                   |
|----|-------------------|-------------------|-------------------|
| Te | -0.1304551248016  | 13.9339694720300  | 6.64065832207300  |
| Te | -0.0453534815322  | 11.8285783317400  | 2.77201398341700  |
| Te | -0.0227506550656  | 9.65943350167600  | -1.08171695809300 |
| Te | -0.0095522305601  | 7.43365026906100  | -4.92787348517700 |
| Te | -0.0367239539569  | 5.16840453373400  | -8.74597024391600 |
| Te | 1.79874365687455  | 13.8757958605100  | 8.61081087217400  |
| Te | 1.90384849108099  | 11.8385944304000  | 4.85646850722900  |
| Te | 1.92629892451947  | 9.69078313942600  | 1.01181920293300  |
| Te | 1.95403122834591  | 7.48903090829600  | -2.83223837225800 |
| Te | 1.93675117340991  | 5.23376347512300  | -6.66239973762000 |
| Te | -2.09316262280907 | 12.0515484380700  | 7.66945914674900  |
| Te | -1.99046053425974 | 9.95975714060400  | 3.79007965440300  |
| Te | -1.96864967267422 | 7.80049509751100  | -0.07758696843351 |
| Te | -1.95495299383392 | 5.58470028826500  | -3.92260866074900 |
| Te | -1.97469627474031 | 3.32218763368500  | -7.74247545589200 |
| Te | -0.04082089853886 | 9.48235430760900  | 6.65848268638500  |
| Te | 0.070036277141640 | 7.33663748908300  | 2.76005167985900  |
| Te | 0.085727454312968 | 5.13901831011900  | -1.12173241651700 |
| Te | 0.080735473394157 | 2.89230355877400  | -4.96322983233100 |
| Te | 1.88390114059222  | 9.43321227562800  | 8.74936378494200  |
| Te | 2.01018217308411  | 7.32685333203800  | 4.91381980684500  |
| Te | 2.03760055175101  | 5.14637089959800  | 1.03816708485800  |
| Te | 2.04695598368159  | 2.91974954113000  | -2.80184451846500 |
| Te | -1.98690685196293 | 7.59760728714000  | 7.77831886109200  |
| Te | -1.86968121351931 | 5.44624353976200  | 3.85821537546200  |
| Te | -1.85236109703529 | 3.26020801466100  | -0.03186684897866 |
| Te | -1.85798804902178 | 1.02238261717200  | -3.88042232984300 |
| Te | 0.099703126124239 | 0.618331149185900 | -1.08591003962200 |

**Te36trig (L3<sub>1</sub>):**

Eform = 4.22637 kJ/mol

Egap = 0.6442 eV

T = 5.87914442 Å

Cartesian coordinates of irreducible part. Ox - axis of periodicity.

|    |                   |                  |                   |
|----|-------------------|------------------|-------------------|
| Te | -0.14319436534905 | 16.1530642921300 | 7.92728784954000  |
| Te | -0.06087597165184 | 14.0507985310500 | 4.06048245575100  |
| Te | -0.03399904515116 | 11.8817291226100 | 0.202695231893700 |

|    |                   |                   |                   |
|----|-------------------|-------------------|-------------------|
| Te | -0.01544034920190 | 9.68153573202000  | -3.65025134581000 |
| Te | -0.02218637073582 | 7.42905983489900  | -7.49413219101000 |
| Te | -0.05356271006124 | 5.15862930953300  | -11.3093761944900 |
| Te | -0.08814660356572 | 2.85666326702300  | -15.1080497248100 |
| Te | -0.17164640382687 | 0.522297018684800 | -18.8868421276000 |
| Te | 1.89104011131222  | 14.0595477401400  | 6.14126305295000  |
| Te | 1.91630271398382  | 11.9131819338000  | 2.29497141844000  |
| Te | 1.94574240215127  | 9.72594046437000  | -1.55535764300300 |
| Te | 1.94743552498167  | 7.49196161651800  | -5.40555982398000 |
| Te | 1.92546294779327  | 5.22399777488700  | -9.22945920307200 |
| Te | 1.91194722011191  | 2.93098710546100  | -13.0356548494400 |
| Te | 1.80849442489264  | 0.617381579357300 | -16.8382016888400 |
| Te | -2.00921846432257 | 12.1835401286900  | 5.07440822445900  |
| Te | -1.98551452494393 | 10.0254868504600  | 1.20489379832400  |
| Te | -1.96509385330533 | 7.83107500638200  | -2.65330344997200 |
| Te | -1.97164946992314 | 5.58379866995300  | -6.49207375597900 |
| Te | -1.99339074436945 | 3.31390955312300  | -10.3075959108600 |
| Te | -2.01675542107590 | 1.02280433206400  | -14.1077943439300 |
| Te | 0.054110513705976 | 9.56157852216600  | 4.04103618722200  |
| Te | 0.069121418091976 | 7.37614197277200  | 0.156289965566600 |
| Te | 0.081507422995507 | 5.15021935498900  | -3.69517960558700 |
| Te | 0.061987657238929 | 2.88826866386400  | -7.53175807215900 |
| Te | 0.036878581915817 | 0.587753579368100 | -11.3675144445100 |
| Te | 2.02084981363876  | 7.37770338810500  | 2.31586071671500  |
| Te | 2.04507166779145  | 5.17062491510900  | -1.53213511897200 |
| Te | 2.03442520477959  | 2.91787135311300  | -5.37231114143400 |
| Te | 2.02989505131339  | 0.612112694073900 | -9.21215655806000 |
| Te | -1.87166975231117 | 5.49660294782900  | 1.24275211028700  |
| Te | -1.86060895411707 | 3.27513922038200  | -2.61131270249100 |
| Te | -1.88057077966334 | 1.02001905168100  | -6.45272361354600 |
| Te | 0.094661665083220 | 2.86388050422000  | 0.201569058127100 |
| Te | 0.090284378665278 | 0.612015207447400 | -3.66740161268900 |
| Te | 2.05744948312835  | 0.629781445100600 | -1.50268806646900 |

**Te45trig (L3<sub>1</sub>):**

Eform = 3.80537 kJ/mol

Egap = 0.6079 eV

T = 5.88732178 Å

Cartesian coordinates of irreducible part. Ox - axis of periodicity.

|    |                   |                   |                    |
|----|-------------------|-------------------|--------------------|
| Te | -0.15415969883826 | 18.3751952130400  | 9.21643897182100   |
| Te | -0.07261008936742 | 16.2729149636300  | 5.34947692462500   |
| Te | -0.04746091630919 | 14.1076895120400  | 1.49240607873100   |
| Te | -0.02127939228466 | 11.9122716554700  | -2.36806004106000  |
| Te | -0.02122149456855 | 9.68561048256500  | -6.22133105246900  |
| Te | -0.03534027761347 | 7.42098066559200  | -10.0612760011200  |
| Te | -0.06830333512093 | 5.15072043763200  | -13.8751556561700  |
| Te | -0.10058650381731 | 2.85502287067500  | -17.6748153461800  |
| Te | -0.18317245962912 | 0.526363511997800 | -21.4540081140100  |
| Te | 1.88137734967503  | 16.2823063157600  | 7.42805645772700   |
| Te | 1.90483569482624  | 14.1370407144800  | 3.58149131817700   |
| Te | 1.93936469815752  | 11.9548164928800  | -0.273181938409800 |
| Te | 1.94509467087889  | 9.73838300960400  | -4.13243588273500  |



|    |                   |                   |                    |
|----|-------------------|-------------------|--------------------|
| Te | 1.94015244351765  | 7.48694732129000  | -7.97712158746500  |
| Te | 1.91291568913275  | 5.21482605943400  | -11.7987278809100  |
| Te | 1.90115945511610  | 2.92750986363100  | -15.6042155209000  |
| Te | 1.79916222059339  | 0.619430498075700 | -19.4068841212100  |
| Te | -2.02446470300512 | 14.4078287200000  | 6.36125521031900   |
| Te | -2.00118279189360 | 12.2521289043100  | 2.49080683627200   |
| Te | -1.97623233858968 | 10.0639417712900  | -1.37314165897100  |
| Te | -1.97475969433489 | 7.83950855381400  | -5.22696924764600  |
| Te | -1.98593663672009 | 5.57771350180800  | -9.05993734842300  |
| Te | -2.01114930050401 | 3.30695809844000  | -12.8755057481500  |
| Te | -2.03196040377686 | 1.02237433281200  | -16.6761382367300  |
| Te | 0.039164700925343 | 11.7882567074100  | 5.32513430858700   |
| Te | 0.056196458903969 | 9.60561428187100  | 1.43796453258300   |
| Te | 0.071681389383220 | 7.39670371555400  | -2.42023116502300  |
| Te | 0.068253924683621 | 5.15244011532800  | -6.26742928685000  |
| Te | 0.046079832999100 | 2.88198284515500  | -10.0994115481400  |
| Te | 0.021623354028576 | 0.585385866549700 | -13.9359632659300  |
| Te | 2.00881523426914  | 9.60444574277600  | 3.59640078417300   |
| Te | 2.03313505583284  | 7.41018450138800  | -0.256299748948500 |
| Te | 2.03799308657712  | 5.17740081166600  | -4.10629943486400  |
| Te | 2.02316319189435  | 2.91269009874100  | -7.94104870505800  |
| Te | 2.01713365962017  | 0.607422887028700 | -11.7822669535900  |
| Te | -1.88816611900098 | 7.72620241336600  | 2.52177021703000   |
| Te | -1.87312967093282 | 5.52083178732000  | -1.33980148462800  |
| Te | -1.87801553918284 | 3.27968576416000  | -5.18731063240200  |
| Te | -1.89859282237691 | 1.01532300072400  | -9.02190381376500  |
| Te | 0.080039137340889 | 5.10178283271200  | 1.48589803214400   |
| Te | 0.092727695700313 | 2.86844786269200  | -2.38443951314100  |
| Te | 0.073307138126676 | 0.606410509743300 | -6.24353159790300  |
| Te | 2.05798723923916  | 2.88125994828400  | -0.219912545755100 |
| Te | 2.04746705101357  | 0.623238156339500 | -4.08117487733800  |
| Te | -1.86378440457445 | 0.991911095275200 | -1.29559672186200  |

**Te55trig (L3<sub>1</sub>):**

Eform = 3.46056 kJ/mol

Egap = 0.5733 eV

T = 5.89399223 Å

Cartesian coordinates of irreducible part. Ox - axis of periodicity.

|    |                  |                   |                   |
|----|------------------|-------------------|-------------------|
| Te | -0.1631549494236 | 20.5988116791600  | 10.5059365612500  |
| Te | -0.0830500164880 | 18.4977611987500  | 6.63952376077400  |
| Te | -0.0578917421509 | 16.3322214259700  | 2.78228304053100  |
| Te | -0.0313361968851 | 14.1434513462100  | -1.07904874465900 |
| Te | -0.0213526131169 | 11.9236397453500  | -4.94248871584300 |
| Te | -0.0296601980832 | 9.68254683006400  | -8.79251934024000 |
| Te | -0.0482849822361 | 7.41259081707900  | -12.6296790082300 |
| Te | -0.0801897175918 | 5.14511270317500  | -16.4435337338100 |
| Te | -0.1107924490063 | 2.85444041129800  | -20.2440327998300 |
| Te | -0.1928965653948 | 0.530486674368400 | -24.0232920881000 |
| Te | 1.87271887534622 | 18.5070184058200  | 8.71608735041400  |
| Te | 1.89606765296528 | 16.3619437178100  | 4.86954260794500  |
| Te | 1.93006685697749 | 14.1822720644900  | 1.01349689808500  |

|    |                   |                   |                     |
|----|-------------------|-------------------|---------------------|
| Te | 1.94321162072973  | 11.9741750779400  | -2.85234696654300   |
| Te | 1.94219570888286  | 9.73977370364200  | -6.70747616056400   |
| Te | 1.92975388439045  | 7.47906242239300  | -10.5495622273600   |
| Te | 1.90286885706510  | 5.20765138540600  | -14.3690709259400   |
| Te | 1.89190681009894  | 2.92536632958300  | -18.1747750435400   |
| Te | 1.79138347731601  | 0.621769299301400 | -21.9774259266800   |
| Te | -2.03738854727830 | 16.6340970576500  | 7.64924086078100    |
| Te | -2.01433637711123 | 14.4784287741800  | 3.77910036002900    |
| Te | -1.98819138623242 | 12.2950282013900  | -0.0880959644193900 |
| Te | -1.98031803514888 | 10.0796366047400  | -3.95010157298400   |
| Te | -1.98410794005687 | 7.83885988263500  | -7.79841436457900   |
| Te | -2.00111818697572 | 5.57028752134700  | -11.6299016966800   |
| Te | -2.02514010525092 | 3.30211237668800  | -15.4451980247400   |
| Te | -2.04479298212169 | 1.02291750058800  | -19.2468555560600   |
| Te | 0.02755364700666  | 14.0154341784800  | 6.61095790775100    |
| Te | 0.04280151876245  | 11.8350058392500  | 2.72330615986700    |
| Te | 0.06307501283253  | 9.63225896270600  | -1.14018565877700   |
| Te | 0.06371380843475  | 7.40600681064500  | -4.99610408665900   |
| Te | 0.05586786324450  | 5.14868416959700  | -8.83780359602700   |
| Te | 0.03165713409480  | 2.87685626887400  | -12.6695542060400   |
| Te | 0.00978788257418  | 0.584385973978400 | -16.5064540615700   |
| Te | 1.99699333026912  | 11.8321608075700  | 4.88039586308500    |
| Te | 2.02392498697331  | 9.64207265070900  | 1.02360629940300    |
| Te | 2.03048440965475  | 7.42515621795100  | -2.83329234365400   |
| Te | 2.03049398770863  | 5.17712257204800  | -6.67781790180700   |
| Te | 2.01121538649388  | 2.90664256325800  | -10.5126795445500   |
| Te | 2.00708190541848  | 0.604816655577300 | -14.3537974379900   |
| Te | -1.90401756429252 | 9.95648042155600  | 3.80454549821700    |
| Te | -1.88515365261669 | 7.75651267945300  | -0.0621311318405000 |
| Te | -1.88502358057293 | 5.53306131659100  | -3.91861623969200   |
| Te | -1.89240557213714 | 3.27803398659300  | -7.75871738664500   |
| Te | -1.91540253551399 | 1.01122232109800  | -11.5937766598900   |
| Te | 0.06689344733236  | 7.33326437503800  | 2.76836714199300    |
| Te | 0.08316736522941  | 5.11467848436800  | -1.10216495784600   |
| Te | 0.08026730129917  | 2.86924498802000  | -4.96399180683900   |
| Te | 0.05865538912404  | 0.601199212601200 | -8.81527910459100   |
| Te | 2.04723472312144  | 5.12331389708900  | 1.06241154319100    |
| Te | 2.05215384211175  | 2.88346530587100  | -2.80116684681800   |
| Te | 2.03698306062062  | 0.617807766649200 | -6.65410409697100   |
| Te | -1.8744341402816  | 3.23699537241400  | -0.0140538287106500 |
| Te | -1.8773419224710  | 0.992922515751600 | -3.87937658073300   |
| Te | 0.10159444235498  | 0.622085503308800 | -1.08883101518200   |

## Parameters of the energy minima of nanorods obtained in helical paradigm

### Te1 (5<sup>th</sup> family):

E<sub>form</sub> = 20.146877773283506 kJ/mol

E<sub>gap</sub> = 1.431695235614831 eV

Q = 3.419391289636317

f = 1.81700283775590 Å

φ = 105.2818965443084°

Cartesian coordinates of irreducible part of monomer. Ox - axis of periodicity.

|    |           |                   |           |
|----|-----------|-------------------|-----------|
| Te | 0.0000000 | 1.306846524187271 | 0.0000000 |
|----|-----------|-------------------|-----------|

### Te3trig (1<sup>st</sup> family):

E<sub>form</sub> = 13.076771873226335 kJ/mol

E<sub>gap</sub> = 1.231400158005961 eV

Q = 3.062496674754749

f = 1.905387798516305 Å

φ = 117.5511480445377°

Cartesian coordinates of irreducible part of monomer. Ox - axis of periodicity.

|    |                  |                  |                   |
|----|------------------|------------------|-------------------|
| Te | 1.95339656355316 | 2.59386030436499 | -1.13907453084472 |
|----|------------------|------------------|-------------------|

|    |                  |                  |                   |
|----|------------------|------------------|-------------------|
| Te | 3.94048651888639 | 3.64092014765182 | 0.464703329496192 |
|----|------------------|------------------|-------------------|

|    |                  |                  |                   |
|----|------------------|------------------|-------------------|
| Te | 0.13804788900327 | 1.46283037652809 | 0.779776877075610 |
|----|------------------|------------------|-------------------|

### Te6trig (1<sup>st</sup> family):

E<sub>form</sub> = 9.597500532841423 kJ/mol

E<sub>gap</sub> = 1.095952306161735 eV

Q = 3.017347287900561

f = 1.926183074811832 Å

φ = 119.3100977947037°

Cartesian coordinates of irreducible part of monomer. Ox - axis of periodicity.

|    |                  |                  |                   |
|----|------------------|------------------|-------------------|
| Te | 1.97820806647724 | 1.03299546291322 | -1.30602197594149 |
|----|------------------|------------------|-------------------|

|    |                   |                  |                   |
|----|-------------------|------------------|-------------------|
| Te | -1.89504152302698 | 2.92795633496996 | -2.31859335739733 |
|----|-------------------|------------------|-------------------|

|    |                   |                  |                   |
|----|-------------------|------------------|-------------------|
| Te | 0.055521679371935 | 2.93847975090796 | -0.22628086165826 |
|----|-------------------|------------------|-------------------|

|    |                  |                  |                  |
|----|------------------|------------------|------------------|
| Te | 1.90054258294822 | 3.21356856588275 | 2.56137011992041 |
|----|------------------|------------------|------------------|

|    |                   |                  |                  |
|----|-------------------|------------------|------------------|
| Te | -1.99907882518562 | 5.03037005354173 | 1.56205895671508 |
|----|-------------------|------------------|------------------|

|    |                   |                  |                  |
|----|-------------------|------------------|------------------|
| Te | -0.04015198058442 | 5.06479813903860 | 3.50267598858565 |
|----|-------------------|------------------|------------------|

### Te7hex (5<sup>th</sup> family):

E<sub>form</sub> = 9.112863311737783 kJ/mol

E<sub>gap</sub> = 0.687939023328269 eV

Q = 3.014404444147208

f = 1.938568918612174 Å

φ = 119.4265755210715°

Cartesian coordinates of irreducible part of monomer. Ox - axis of periodicity.

|    |           |                  |           |
|----|-----------|------------------|-----------|
| Te | 0.0000000 | 1.27951281375057 | 0.0000000 |
|----|-----------|------------------|-----------|

|    |           |                  |           |
|----|-----------|------------------|-----------|
| Te | 0.0000000 | 5.73682995064376 | 0.0000000 |
|----|-----------|------------------|-----------|

|    |                  |                  |              |
|----|------------------|------------------|--------------|
| Te | -0.0182031449204 | 3.40765873398894 | 3.9200564911 |
|----|------------------|------------------|--------------|

|    |                  |                  |              |
|----|------------------|------------------|--------------|
| Te | -1.9385689108055 | 1.57920896584789 | 2.7996073605 |
|----|------------------|------------------|--------------|

|    |                  |                  |              |
|----|------------------|------------------|--------------|
| Te | 1.94500529016631 | 3.98161556318303 | 1.0186471473 |
|----|------------------|------------------|--------------|

### Te10trig (1<sup>st</sup> family):

Eform = 7.598433380537244 kJ/mol

Egap = 0.906027859872495 eV

Q = 3.009972810227546

f = 1.951518401057611 Å

$\varphi = 119.6024092897985^\circ$

Cartesian coordinates of irreducible part of monomer. Ox - axis of periodicity.

|    |                   |                   |                  |
|----|-------------------|-------------------|------------------|
| Te | 0.117600609004519 | 0.627835539071548 | 1.08793533841398 |
| Te | -0.08803449625095 | 7.25434480618725  | 4.77020158103782 |
| Te | -2.04720533698181 | 7.23781906796245  | 2.82925615279183 |
| Te | 1.86944012420124  | 5.41445355066728  | 3.82305987712677 |
| Te | 0.003960271556720 | 2.79933326200258  | 4.96789569078841 |
| Te | -1.92079638998588 | 2.79207632709430  | 2.87337073281048 |
| Te | 1.96851083392623  | 0.960252310120637 | 3.96476854926442 |
| Te | -0.01581350850245 | -1.63292993999542 | 4.99184769150893 |
| Te | -1.92701692005139 | -1.64104294999902 | 2.84395655990681 |
| Te | 1.93214566310191  | -3.45473634625432 | 3.97962274574521 |

**Te19hex** (5<sup>th</sup> family):

Eform = 5.534058478968291 kJ/mol

Egap = 0.582504603207894 eV

Q = 3.004150868469393

f = 1.955609174294852 Å

$\varphi = 119.8341946732586^\circ$

Cartesian coordinates of irreducible part of monomer. Ox - axis of periodicity.

|    |                   |                  |                  |
|----|-------------------|------------------|------------------|
| Te | 0.0000000         | 1.25579755331989 | 0.0000000        |
| Te | 0.0000000         | 5.87087402026286 | 0.0000000        |
| Te | 0.0000000         | 10.2205045042560 | 0.0000000        |
| Te | 1.94402810021652  | 3.95783007738076 | 1.05405920190190 |
| Te | 1.95340024329252  | 8.48008866963735 | 1.04063781289705 |
| Te | -0.04661004540523 | 7.95831002745133 | 3.95646634586188 |
| Te | -0.00595899904532 | 3.51319681742652 | 3.90374294792337 |
| Te | -0.01394149723874 | 5.63369495306403 | 7.80706504049454 |
| Te | 0.021170716669161 | 1.20594498763728 | 7.84729114863418 |
| Te | -1.95561082014132 | 1.62327837911003 | 2.83045284431384 |
| Te | -1.95561082014132 | 3.81526673859926 | 6.65265442877013 |
| Te | -1.96806703789562 | 6.16274449950886 | 2.84465401227543 |

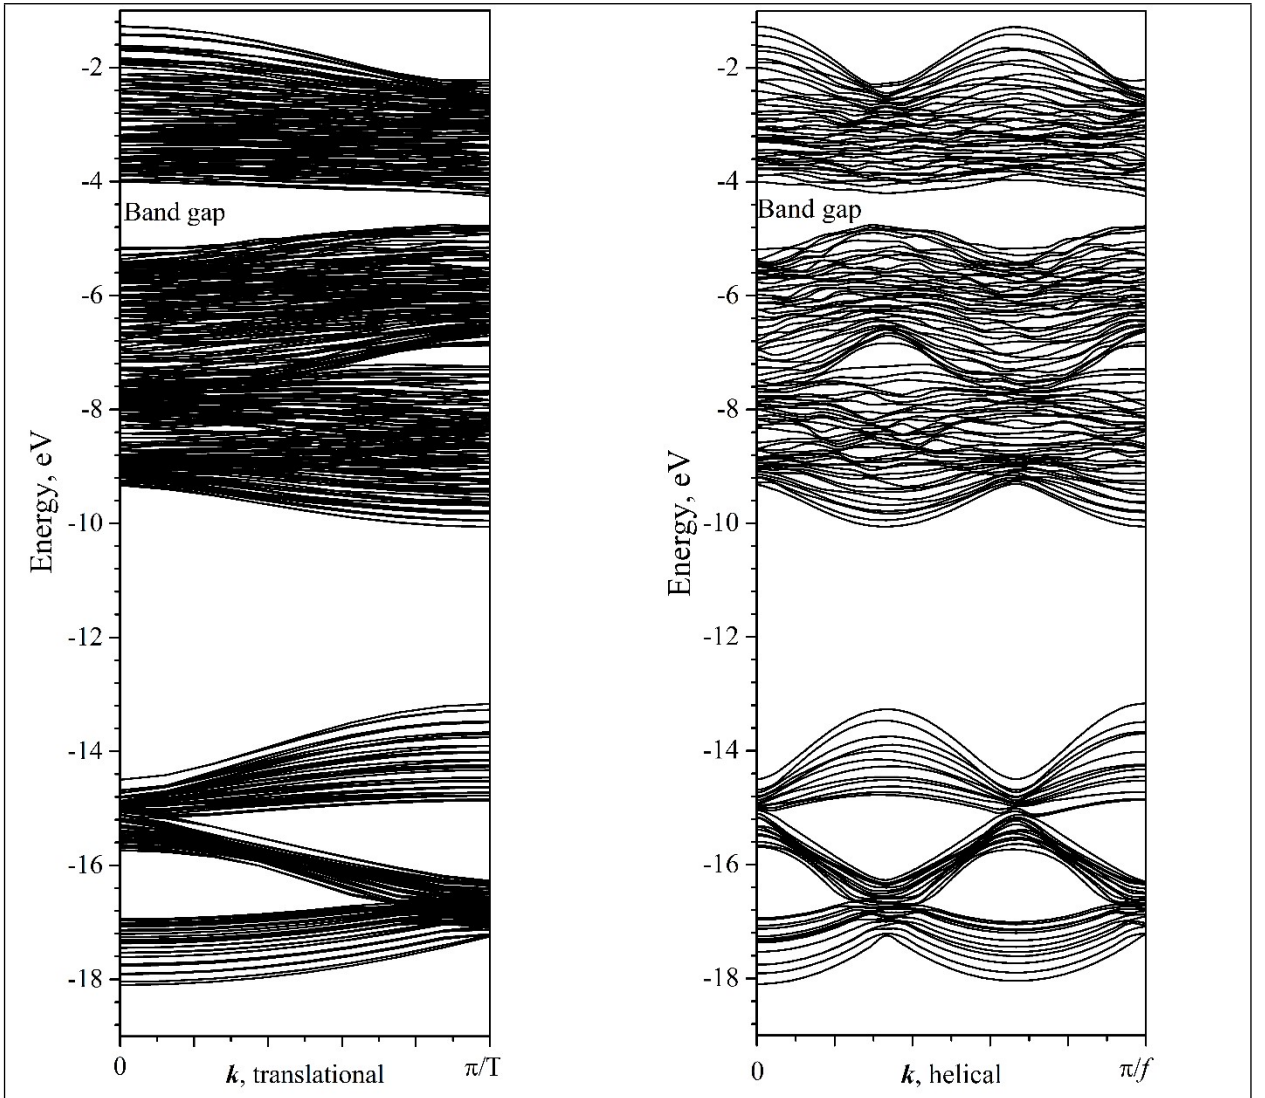

**Figure S2.** Electronic states of Te<sub>37</sub>hex, L<sub>3</sub><sub>121</sub>. **Left)** TBZ; **Right)** HBZ.
